# Supplementary material for: Construction of a 2D/2D heterojunction via integrating MoS2 on Co-doped g-C3N4 to improve photocatalytic hydrogen evolution under visible light irradiation
Source: Royal Society of Chemistry journal article supplement (doi:10.1039/d1nj01973b), 2021-01-01
Supplement: d1nj01973b1.pdf [file d1nj01973b1.pdf]

Construction of 2D/2D heterojunction via integrating MoS<sub>2</sub> on Co-Doped  
g-C<sub>3</sub>N<sub>4</sub> to improve the photocatalytic hydrogen evolution under visible  
light irradiation

Shaopeng Tian <sup>a</sup>, Huaping Ren <sup>a</sup>, Jianhong Peng <sup>b, c\*</sup>, Zongcheng Miao <sup>a\*</sup>

<sup>a</sup>*Xi'an Key Laboratory of Advanced Photo-electronics Materials and Energy*

*Conversion Device, School of Science, Xijing University, Xi'an, Shaanxi 710000,*

*China*

<sup>b</sup>*School of Physics and Information Technology, Shaanxi Normal University, Xi'an*

*710062, PR China*

<sup>c</sup>*College of Physics and Electronic Information Engineering, Qinghai Nationalities*

*University, Xining 810007, PR China*

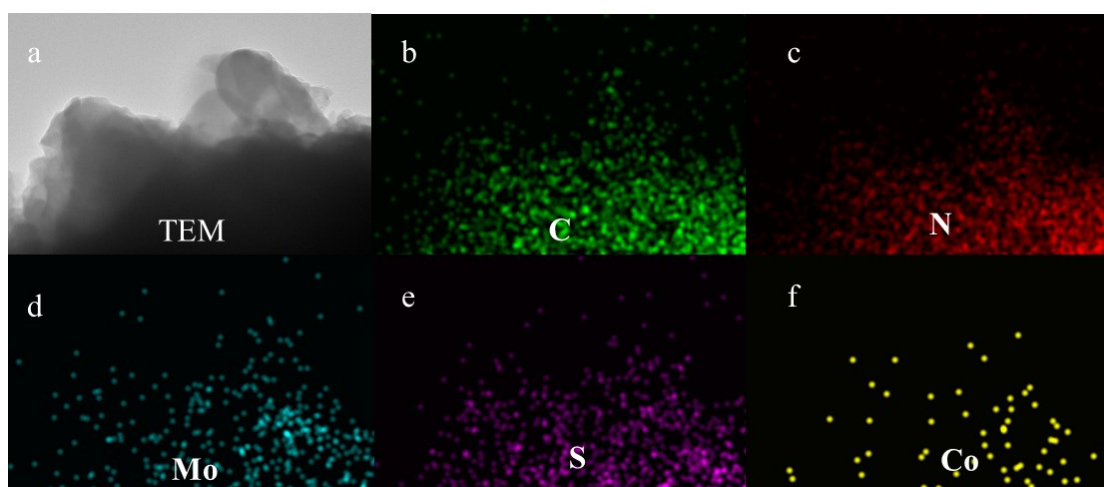

**Fig S1.** a) TEM images of MoS<sub>2</sub>/CoCN-3, and the spatially resolved elemental maps of MoS<sub>2</sub>/CoCN-3 containing (b) C, (c) N, (d) Mo, (e) S, (f) Co.

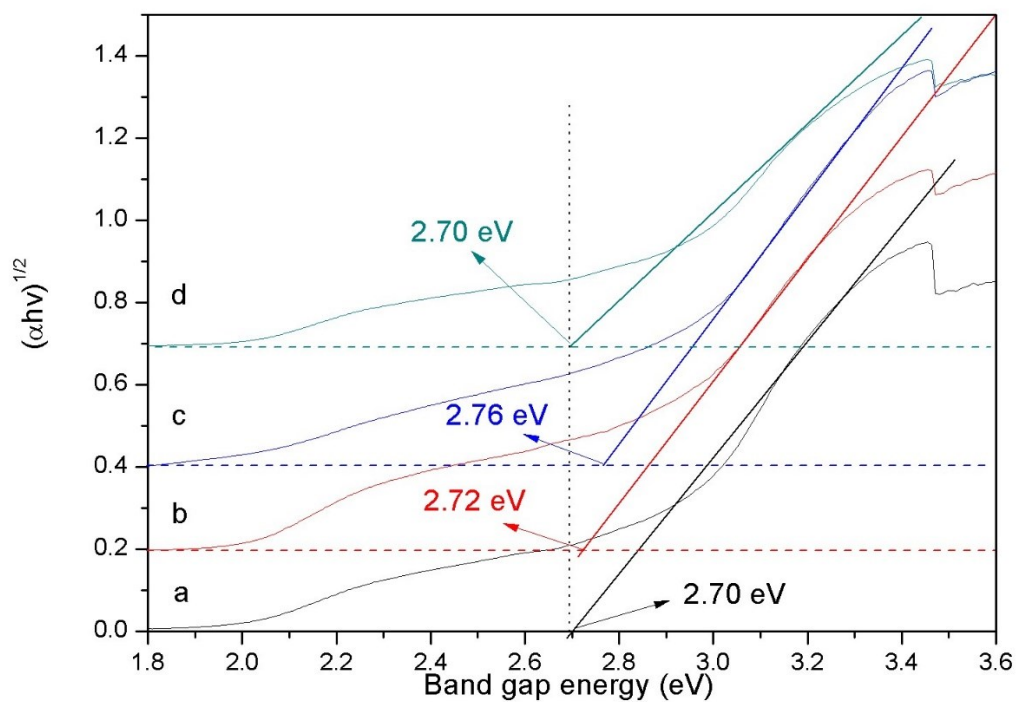

**Fig S2.** the band gap of samples determined from the  $(\alpha h\nu)^{1/2}$  versus photon-energy plots of (a) B-CN, (b) B-CoCN, (c) 2D-CoCN, (d)  $\text{MoS}_2/\text{CoCN-3}$ .

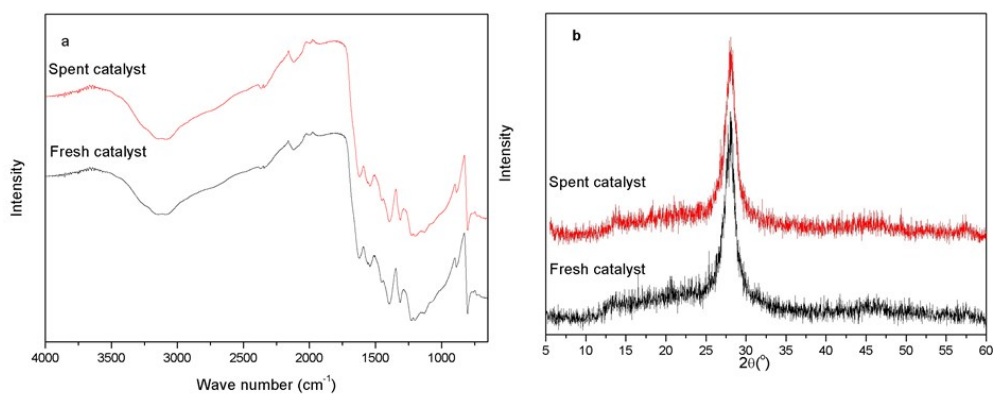

**Fig. S3** The (a) IR and (b) XRD patterns of fresh and spent  $\text{MoS}_2/\text{CoCN-3}$  catalyst.
